# Supplementary material for: B4GALT1-dependent galectin-8 binding with TGF-β receptor suppresses colorectal cancer progression and metastasis
Source: PubMed Central journal article supplement (PMC11375092; doi:10.1038/s41419-024-07028-3), 2024-09-04

# Raw images of immunoblotting experiments

## Figure 1A

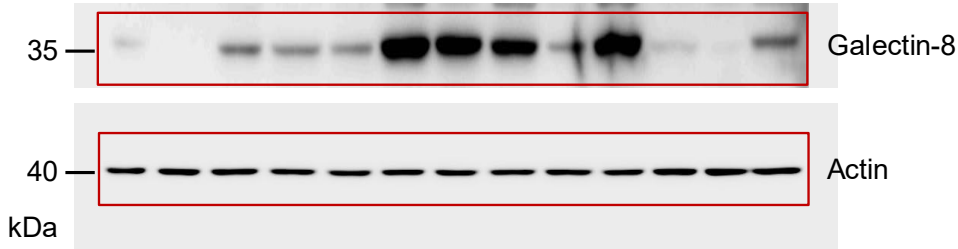

## Figure 1D

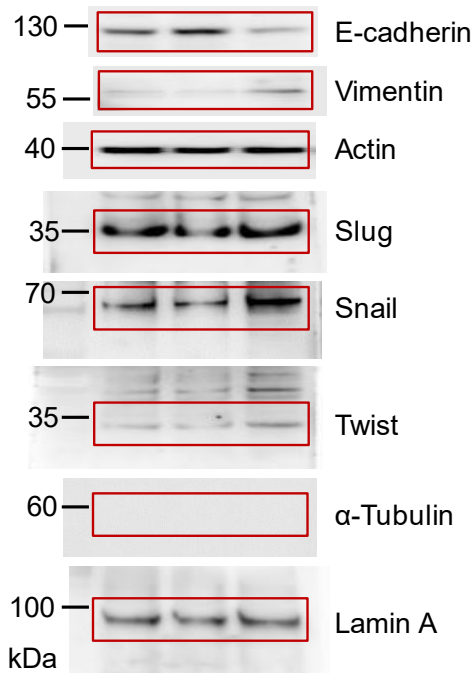

## Figure 1H

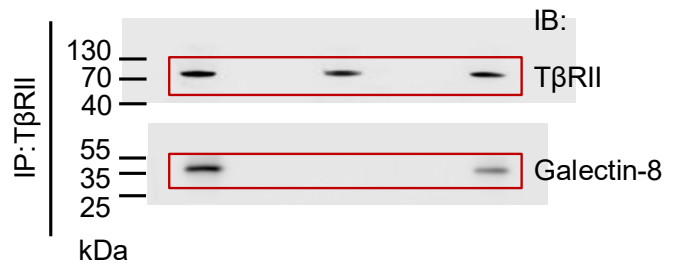

## Figure 1I

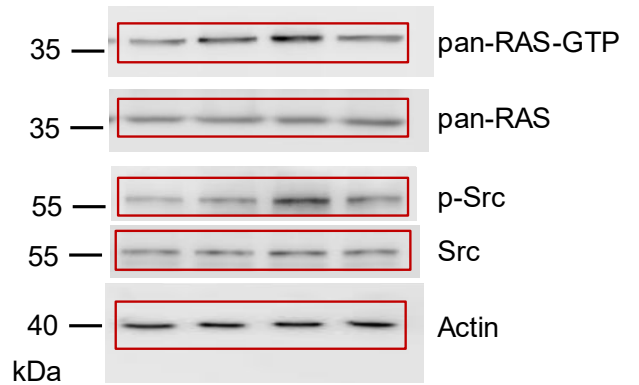

Figure 2D

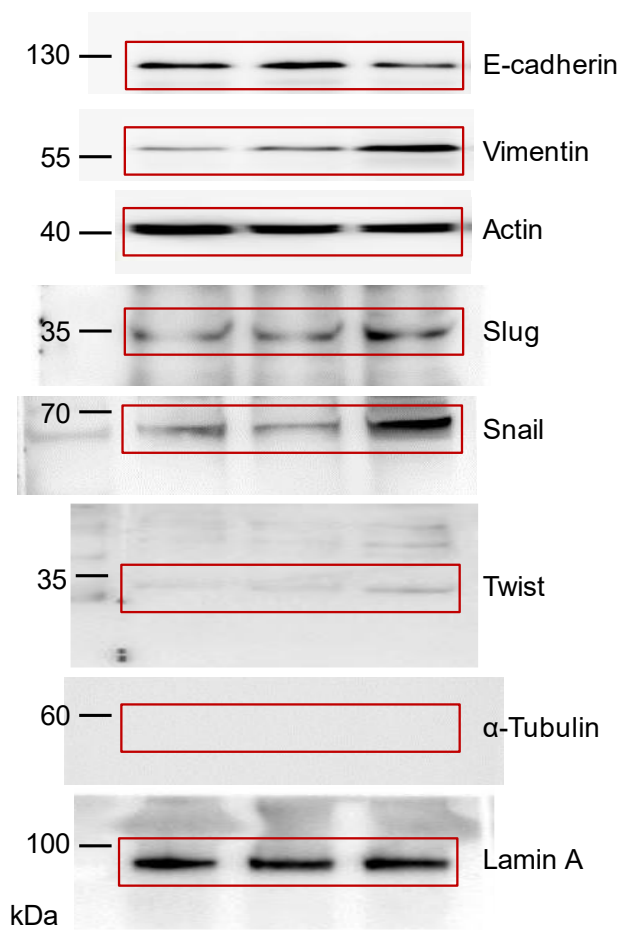

Figure 2H

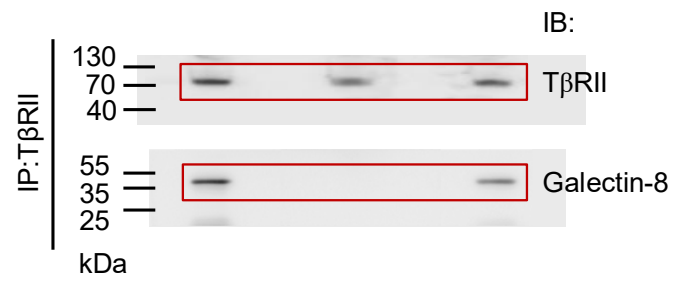

Figure 2K

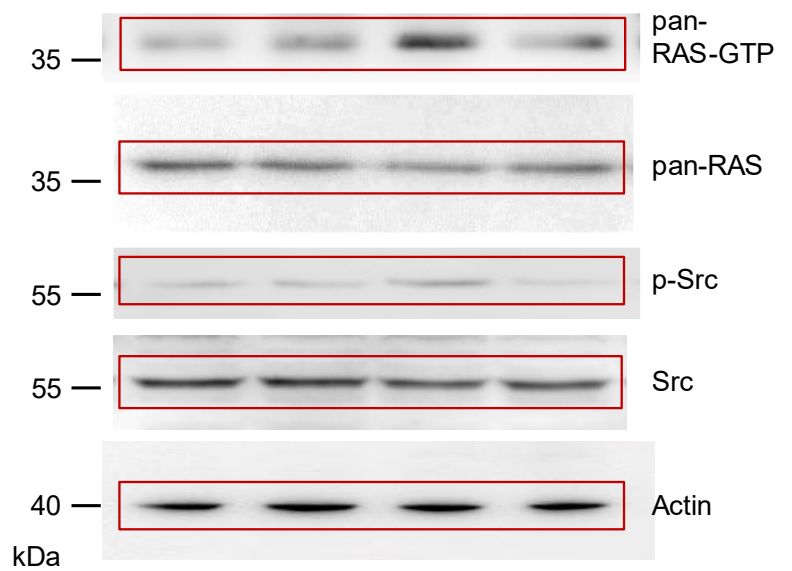

Figure 3F

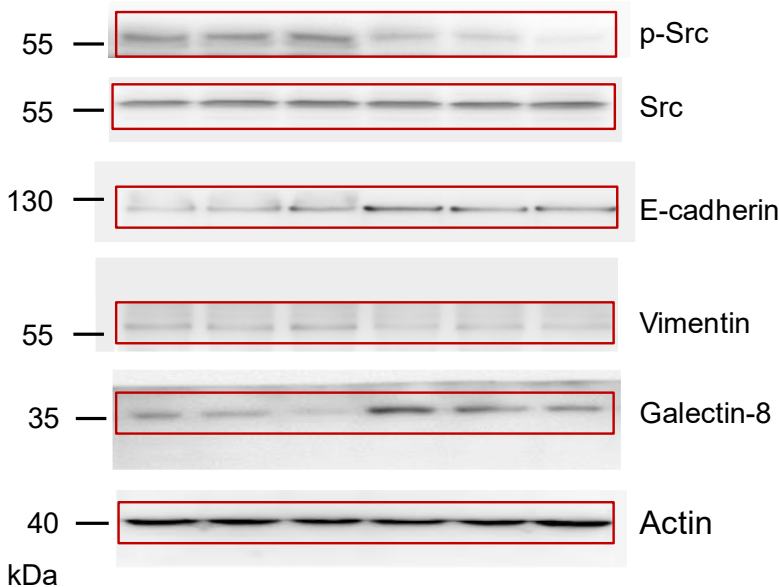

Figure 4C

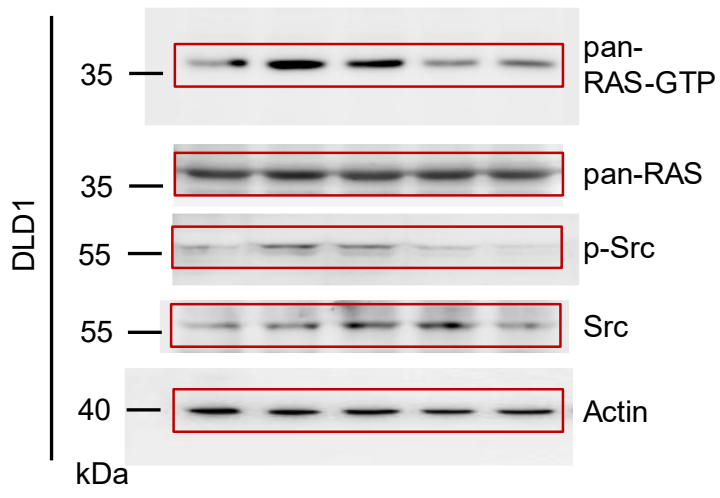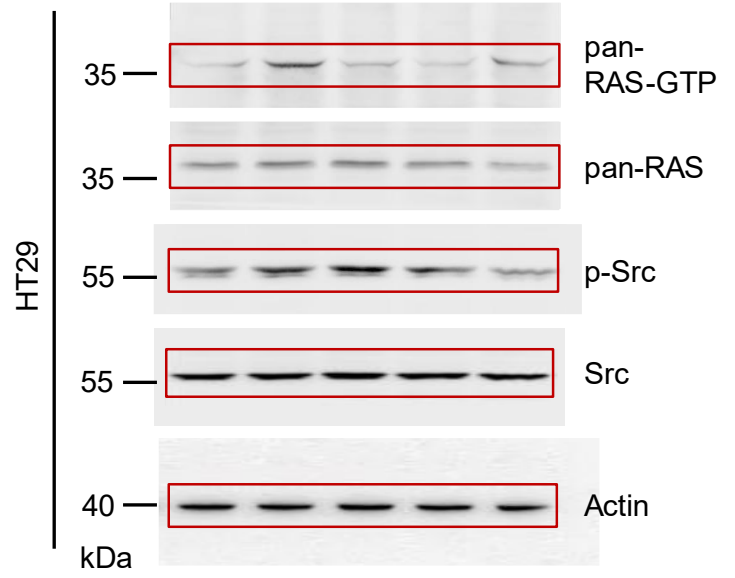

Figure 5F

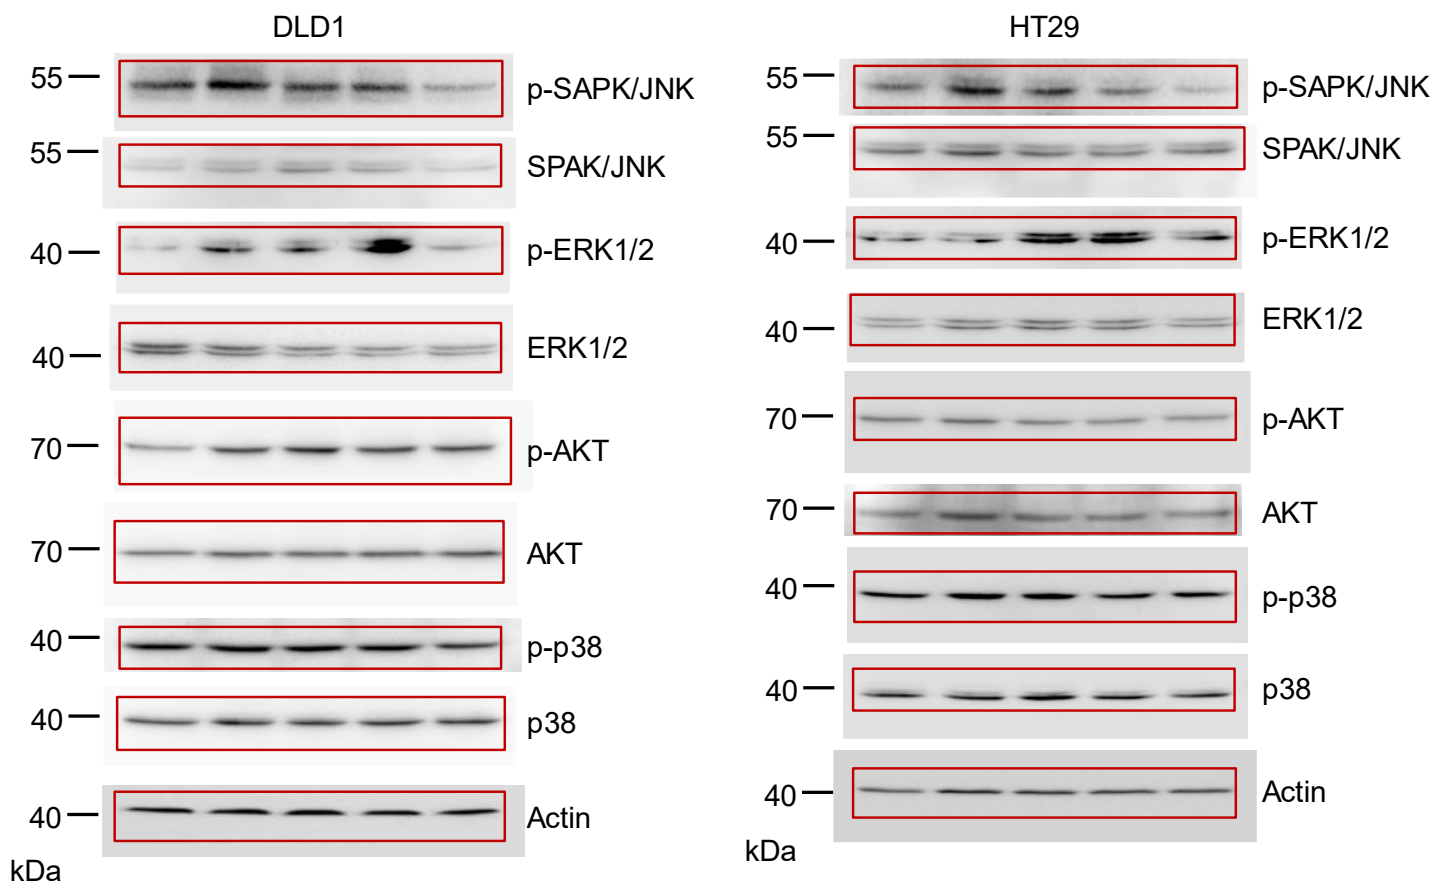

Figure 6B

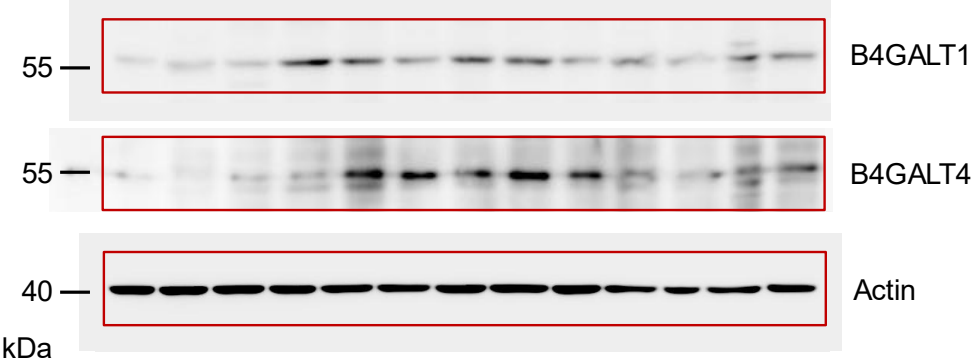

Figure 6J

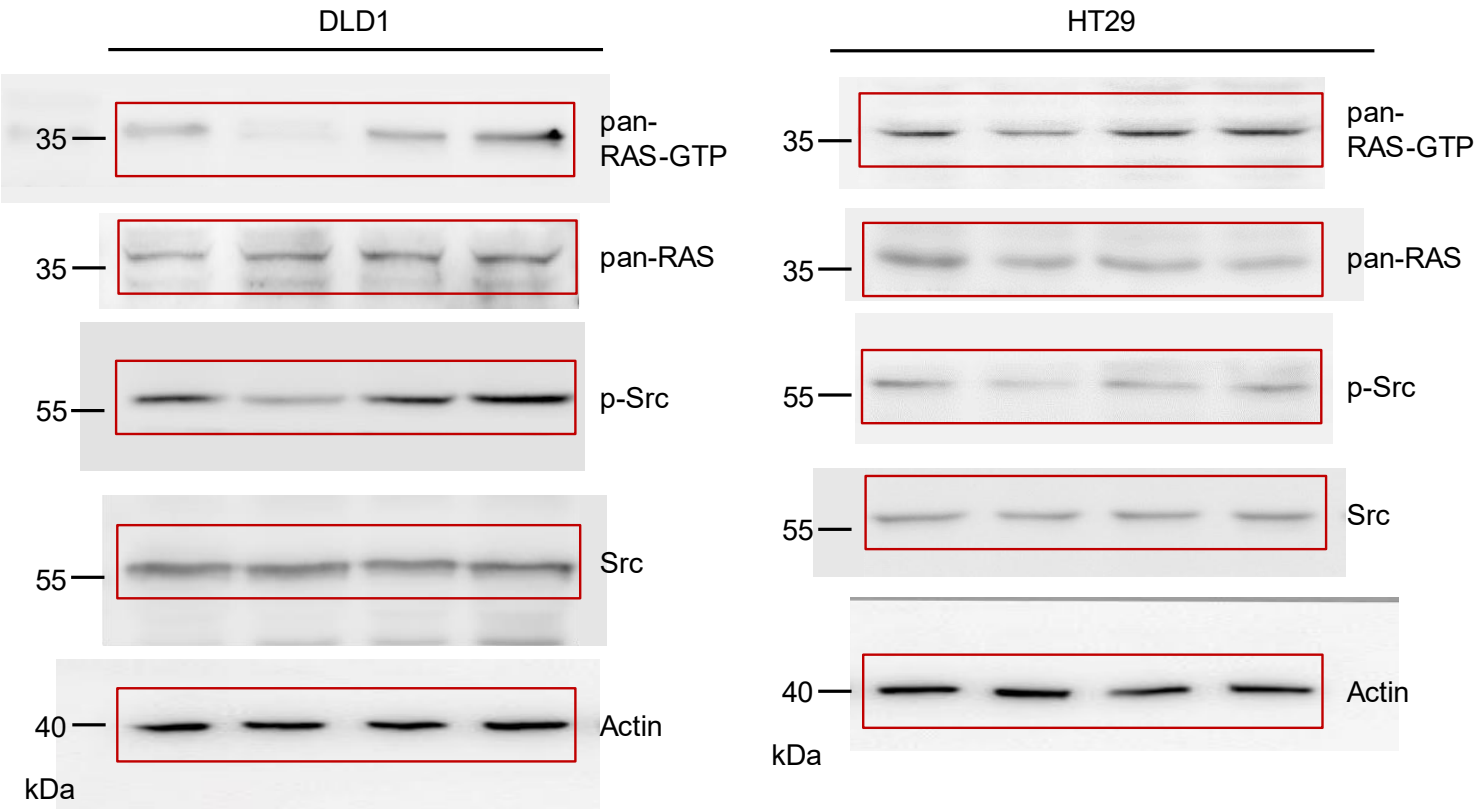

Figure S1D

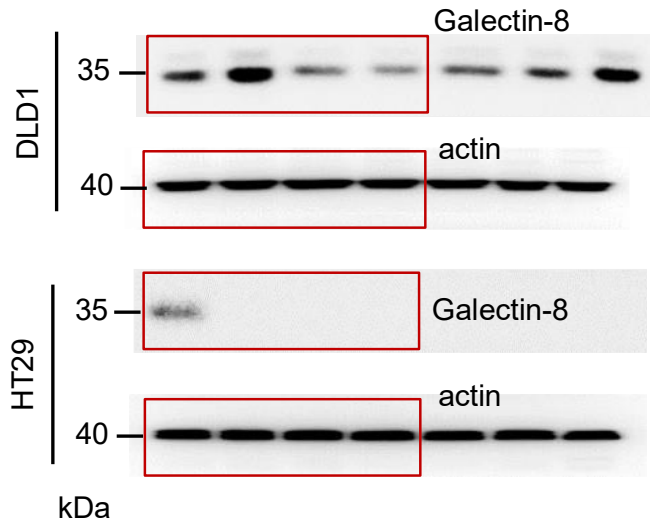

Figure S1E

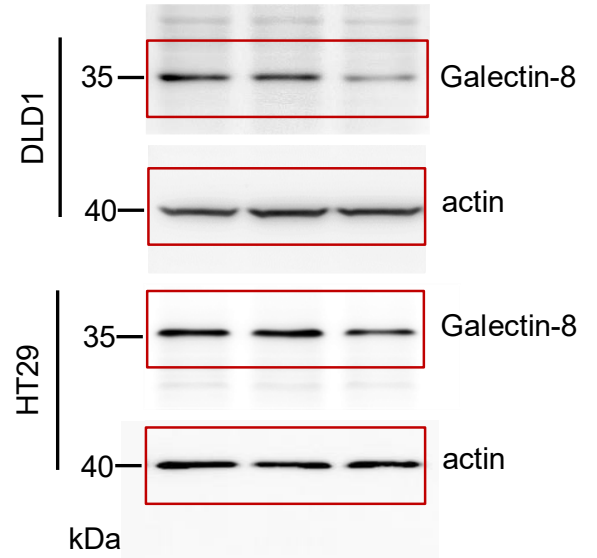

Figure S1F

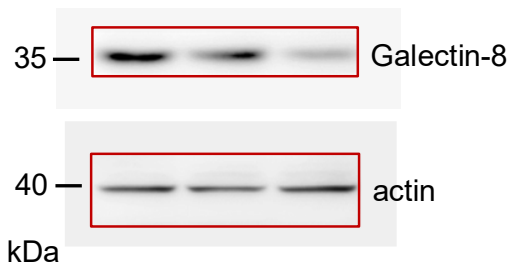

Figure S1G

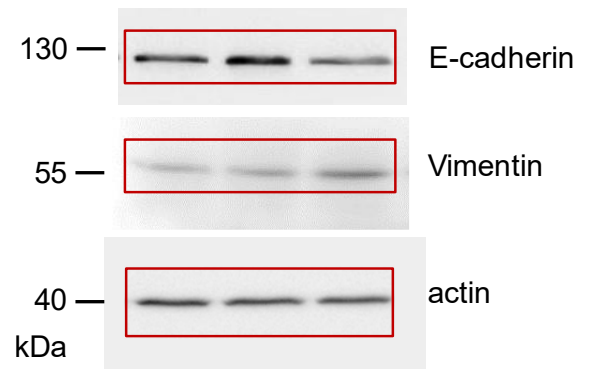

Figure S2D

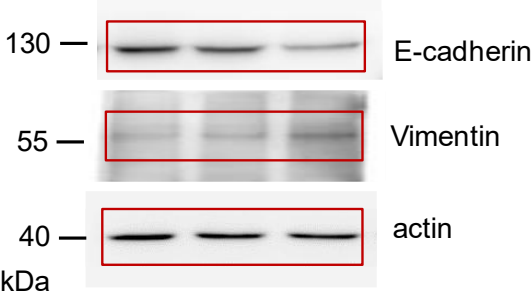



Figure S3B

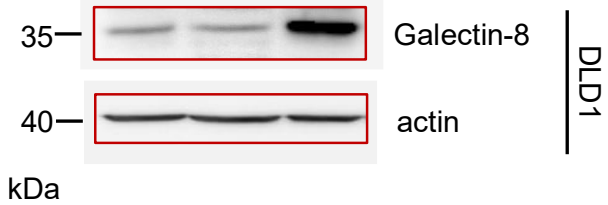

Figure S4G

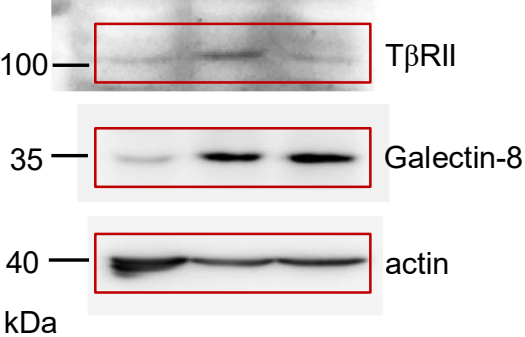

Figure S5C

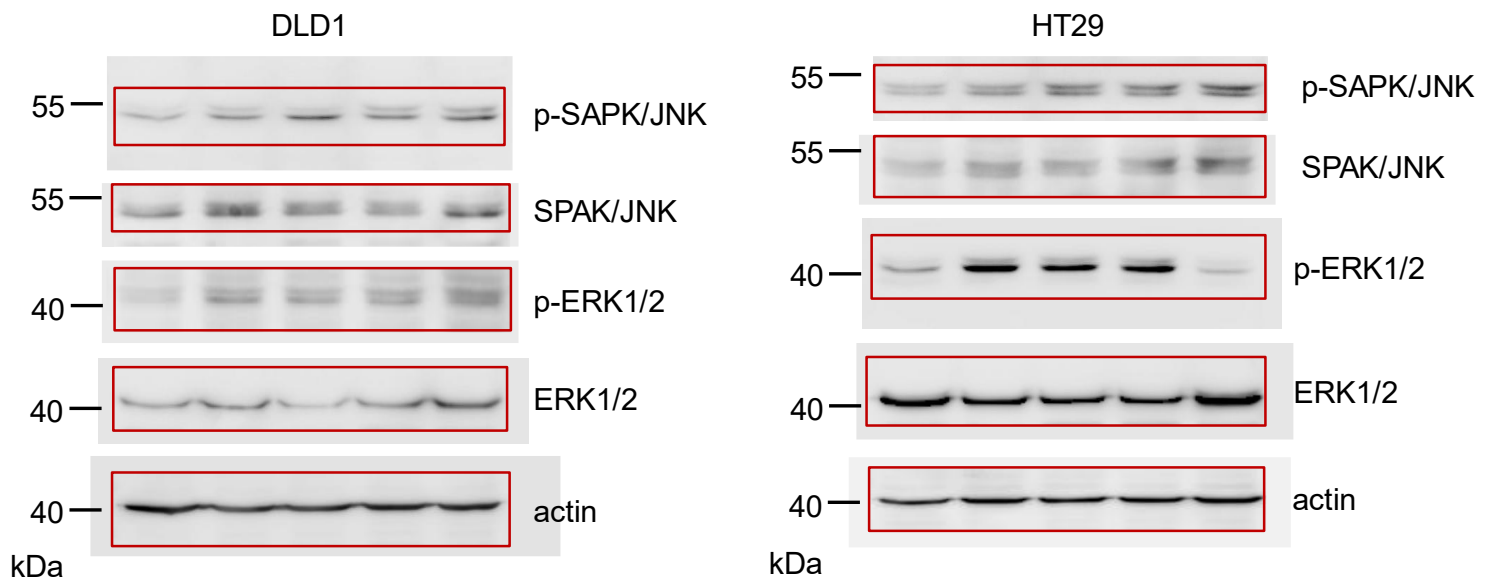

Figure S6C

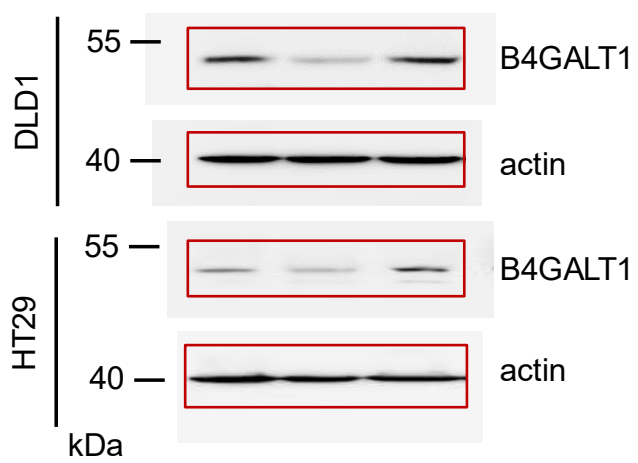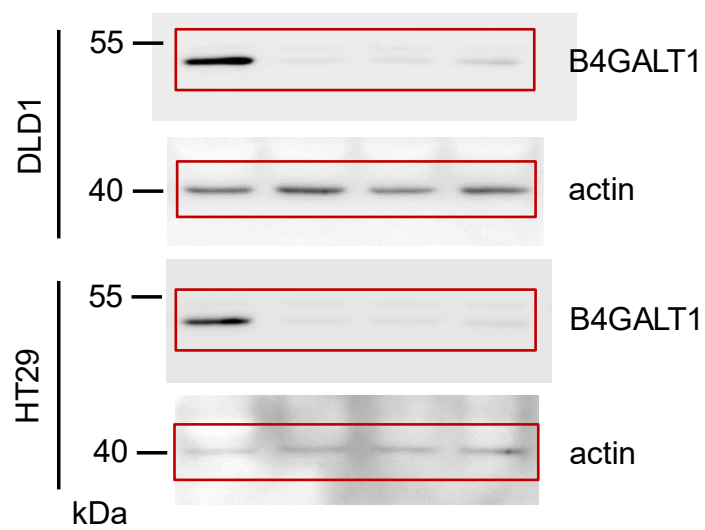

Supplement: 41419_2024_7028_MOESM2_ESM.pdf [file 41419_2024_7028_MOESM2_ESM.pdf]
